# Supplementary material for: Zeolite silica nanoparticles-supported open-tubular columns for isomer and chiral separation using capillary electrochromatography coupled with amperometric detection
Source: Royal Society of Chemistry journal article supplement (doi:10.1039/c9nj04859f), 2019-12-12
Supplement: c9nj04859f1.pdf [file c9nj04859f1.pdf]

## Electronic supplementary information

### **Zeolite silica nanoparticles-supported open-tubular columns for isomer and chiral separation using capillary electrochromatography coupled with amperometric detection**

Xiaoshuang Zhao <sup>a</sup>, Linzhen Liu <sup>a</sup>, Na Li <sup>a</sup>, Tingting Wang <sup>a</sup>, Yuzhu Chai <sup>a</sup>, Ziyue Yang <sup>a</sup>, Jiannong Ye <sup>a</sup>, Qingcui Chu <sup>a,\*</sup>, Li Chen <sup>b,\*</sup>

<sup>a</sup> *School of Chemistry and Molecular Engineering, East China Normal University, Shanghai 200241, China*

<sup>b</sup> *Shanghai Key Laboratory of Green Chemistry and Chemical Processes, School of Chemistry and Molecular Engineering, East China Normal University, Shanghai 200062, China*

---

\* Corresponding author: Qingcui Chu, qcchu@chem.ecnu.edu.cn (Q. Chu); second corresponding author: Li Chen, chenli@chem.ecnu.edu.cn (L. Chen).  
Xiaoshuang Zhao and Linzhen Liu have equal contribution to this paper.

## Synthesis and characterization of zeolite SiO<sub>2</sub>NPs

Zeolite SiO<sub>2</sub>NPs were prepared as described in the literature.<sup>1</sup> In a typical process, TPAOH, TEOS and deionized water were mixed firstly according to a certain molar ratio and hydrolyzed for a certain time at room temperature; then, the hydrolysate ethanol was evaporated in a water bath; finally, the white powder zeolite SiO<sub>2</sub>NPs could be obtained by a series of filtration, washing and baking after hydrothermal crystallization. Two diameter sizes of zeolite SiO<sub>2</sub>NPs (S-1, 50 nm; S-2, 400 nm) were selectively prepared in a certain molar ratio of TPAOH, TEOS, and deionized water, respectively.

The XRD patterns were collected on a Rigaku Ultima IV diffractometer with Cu-K $\alpha$  radiation ( $\lambda=1.5405$  Å) in the  $2\theta$  angle ranging from 5 to 35°. The X-ray powder diffraction patterns of samples were shown in Fig. S1A. All the diffraction peaks of synthetic samples were in accordance with those of the standard sample of MFI, and there were no other peaks, which indicated that there were no mixed crystal phases, and that high purity of zeolite SiO<sub>2</sub>NPs could be synthesized successfully at two different mole ratios of TPAOH, TEOS and deionized water. The SEM as shown in Fig. S1B further demonstrated that uniform zeolite SiO<sub>2</sub>NPs with average crystallite sizes of 50 and 400 nm could be obtained when changing the molar ratio of TPAOH, TEOS, and deionized water.

## References

- 1 B.J. Schoeman, *Micropor. Mesopor. Mat.*, 1998, **22**, 9-22.

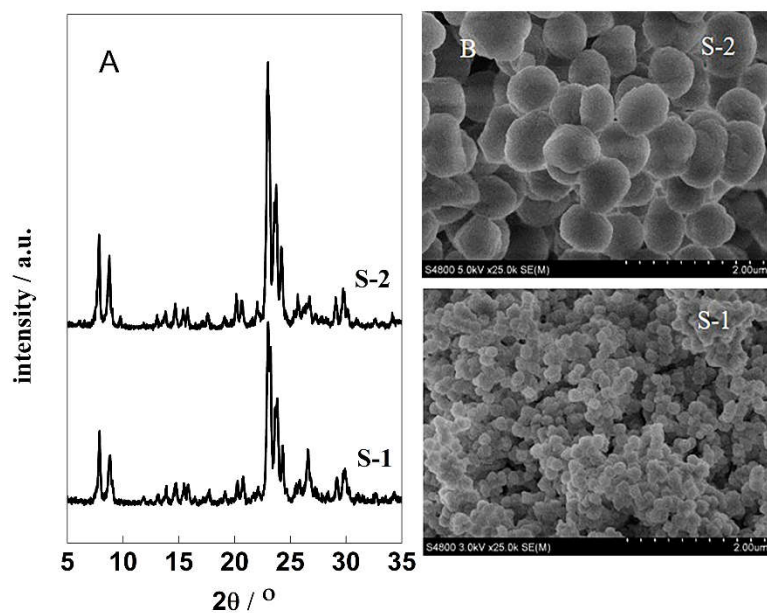

**Fig. S1.** (A) XRD and (B) SEM of zeolite SiO<sub>2</sub>NPs with different diameters

The zeta potential values of zeolite  $\text{SiO}_2\text{NPs}$  at different pH values (3.00-11.00) was measured on a Zetasizer Nano ZSE instrument as shown in Fig. S2. Zeolite  $\text{SiO}_2\text{NPs}$  dispersions were prepared with 10 mM borate buffer adjusted by 0.1 M HCl or 0.1 M NaOH, respectively.

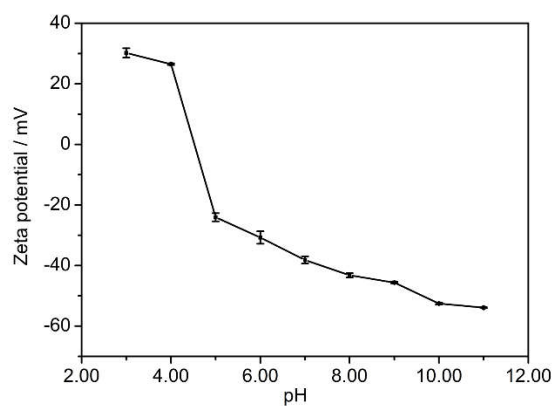

**Fig. S2.** Effects of pH values of the running buffer on the zeta potential values of zeolites  $\text{SiO}_2\text{NPs}$ . Experimental conditions: concentration of zeolites  $\text{SiO}_2\text{NPs}$ ,  $0.5 \text{ mg}\cdot\text{mL}^{-1}$ ; and running buffer, 10 mM borate buffer (pH 3.00-11.00).

### Optimization of heat time of Zeolite SiO<sub>2</sub>NPs-OT column

The effects of heat time (1-4 h) for zeolite SiO<sub>2</sub>NPs-OT columns on the resolution were also investigated, and propylparaben isomers were selected as the model molecules. The resolutions of propylparaben isomers on the zeolite SiO<sub>2</sub>NPs-OT column with different heat time were shown in Fig. S3. The results showed with increasing the heat time, the resolution of the model isomers improved; the maximum resolution ( $R=1.6$ ) was obtained when the heat time was maintained at 3 h. Therefore, 3 h was chosen as the optimal heat time.

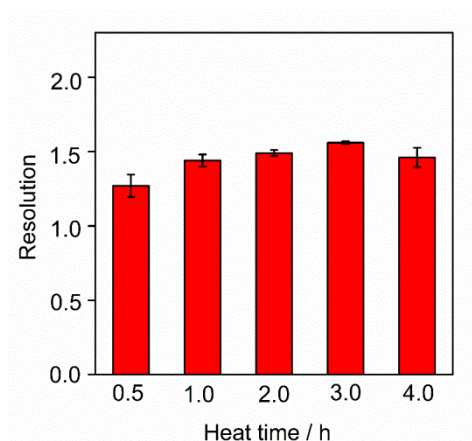

**Fig. S3.** Effects of heat time on the resolution of propylparaben isomers. Experimental conditions: running buffer, 80 mM borate buffer (pH 8.00); the length of OT column, 30 cm; separation voltage, 5 kV; injection time, 8 s (at 5 kV); working electrode, 300  $\mu$ m diameter carbon-disk electrode; oxidation potential, +0.95 V (vs. SCE).

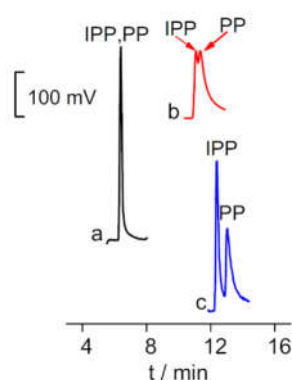

**Fig. S4.** Electropherograms of PP and IPP on (a) the bare capillary and zeolite SiO<sub>2</sub>NPs-OT columns coated with (b) 400 nm and (c) 50 nm zeolite SiO<sub>2</sub>NPs, respectively. The concentration of zeolite SiO<sub>2</sub>NPs was 5.0 mg·mL<sup>-1</sup>, and the other electrophoretic conditions were the same as Fig. S2.

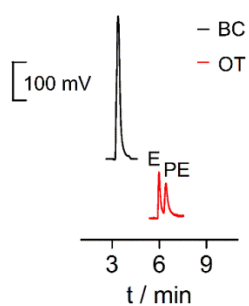

**Fig. S5.** Comparative electropherograms of E and PE in the BC and OT chiral columns. CE conditions: 10 mM borate buffer (pH 9.00); separation voltage, 5 kV; injection time, 8 s (at 5 kV); the length of OT column, 30 cm; working electrode, 300  $\mu\text{m}$  diameter carbon-disk electrode; oxidation potential, +0.95 V (vs. SCE).

**Table S1.** Information of selected model molecules, resolution and their calculated theoretical plates based on this proposed method <sup>a</sup>

| Model molecules    | CAS No. | Structure                                                                            | p <i>K</i> <sub>a</sub> | Number of theoretical plates<br>(m <sup>-1</sup> ) | Resolution                   |
|--------------------|---------|--------------------------------------------------------------------------------------|-------------------------|----------------------------------------------------|------------------------------|
| Paraben homologous | MP (1)  | 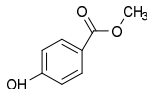   | 8.31                    | 107963                                             |                              |
|                    | EP (2)  | 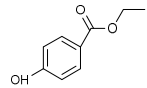   | 8.31                    | 97690                                              | <i>R</i> <sub>1/2</sub> =4.9 |
|                    | PP (3)  | 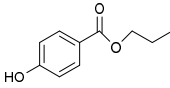   | 8.23                    | 33433                                              | <i>R</i> <sub>2/3</sub> =2.6 |
|                    | BP (4)  | 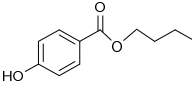   | 8.22                    | 17633                                              | <i>R</i> <sub>3/4</sub> =1.9 |
| Branched isomers   | n-BP    | 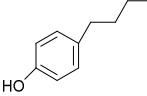  | 10.11                   | 39770                                              | 1.5                          |
|                    | t-BP    | 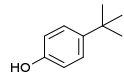 | 10.13                   | 7433                                               |                              |
|                    | PP      | 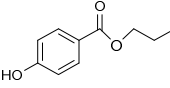 | 8.23                    | 33433                                              | 1.6                          |

|                        |               |            |                                                                                      |       |             |                                 |
|------------------------|---------------|------------|--------------------------------------------------------------------------------------|-------|-------------|---------------------------------|
| Position isomers       | IPP           | 4191-73-5  | 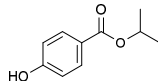   | 8.40  | 77276       | $R_{1/2}=3.7$<br>$R_{2/3}=11.6$ |
|                        | 3-Cl-4-MA (1) | 95-74-9    | 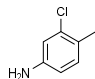   | 3.97  | 80930       |                                 |
|                        | 4-Cl-2-MA (2) | 95-69-2    | 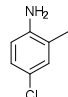  | 3.81  | 108200      |                                 |
|                        | 5-Cl-2-MA (3) | 95-79-4    | 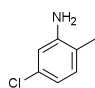   | 3.39  | 96510       |                                 |
| Conformational isomers | MI            | 87-89-8    | 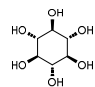   | 12.63 | 71050       | 1.6                             |
|                        | DI            | 643-12-9   | 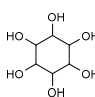   | 12.63 | 84720       |                                 |
| Epimers                | E             | 299-42-3   | 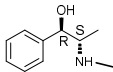  | 13.96 | 15270       | 1.6                             |
|                        | PE            | 90-82-4    | 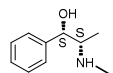 | 13.96 | 10652       |                                 |
| Enantiomers            | RIT           | 23239-51-2 | 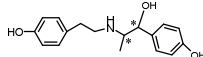 | /     | 26271/20499 | 1.8                             |
|                        | SAL           | 18559-94-9 | 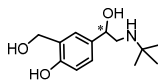 | 9.99  | 14157/11622 | 1.5                             |

<sup>a</sup> The related information was cited from the web of <https://scifinder.cas.org/scifinder/view/scifinder/scifinderExplore.jsf>.

**Table S2.** Comparison of different OT-CEC methods for analysis of E and PE

| Material                                                   | Column<br>(id × effective<br>length) | Detector | Running buffer                                                                 | Analytical<br>time /min | Real<br>sample | LODs<br>/ ng·mL <sup>-1</sup> | Recovery          | Performance                                                                                                          | Ref.               |
|------------------------------------------------------------|--------------------------------------|----------|--------------------------------------------------------------------------------|-------------------------|----------------|-------------------------------|-------------------|----------------------------------------------------------------------------------------------------------------------|--------------------|
| Graphene<br>oxide                                          | 75 μm×38 cm                          | UV       | 60 mM PBS - 10<br>mM SDS -<br>20%v/v methanol<br>10 mM borate -                | 15                      | Ephedra        | 605                           | /                 | Retention time: <2.05 %<br>peak areas: <17.91 %                                                                      | 29                 |
| Homochiral<br>MOFs                                         | 75 μm×30 cm                          | UV       | 15% v/v<br>methanol (pH<br>9.3)                                                | 3                       | /              | /                             | /                 | E: 12580 plates.m <sup>-1</sup><br>PE: 9558 plates.m <sup>-1</sup>                                                   | 34                 |
| Homochiral<br>MOFs                                         | 100 μm×21 cm                         | DAD      | 75 mM borate<br>(pH 9.4)                                                       | < 3                     | Ephedra        | 100                           | /                 | Retention time: < 2.65 %<br>peak areas: < 4.52 %                                                                     | 33                 |
| Graphene<br>oxide<br>modified<br>tentacle-typ<br>e polymer | 75 μm×41.5 cm                        | PDA      | 30 mM<br>Na <sub>2</sub> HPO <sub>4</sub> -<br>50% v/v<br>methanol (pH<br>8.5) | 10                      | /              | /                             | /                 | E:184397 plates.m <sup>-1</sup><br>PE: 196901 plates.m <sup>-1</sup>                                                 | 35                 |
| Zeolite<br>SiO <sub>2</sub> NPs                            | 50 μm×30 cm                          | AD       | 15 mM borate<br>(pH 9.0)                                                       | < 8                     | Ephedra        | 29.2-55.1                     | 86.4 –<br>105.8 % | Retention time: < 6.1 %<br>peak areas: < 8.4 %<br>E:15270 plates.m <sup>-1</sup><br>PE: 10652 plates.m <sup>-1</sup> | In<br>this<br>work |

**Table S3.** Comparison of silica materials as stationary phases in CEC

| Material                                                              | Partical size /nm | Column type<br>(id × effective length) | Analyte                                                        | Analytical time /min | Detector | Performance                                                           | Ref. |
|-----------------------------------------------------------------------|-------------------|----------------------------------------|----------------------------------------------------------------|----------------------|----------|-----------------------------------------------------------------------|------|
| PDMAEMA modified fibrous mesoporous SiO <sub>2</sub> NPs <sup>a</sup> | 200-300           | OT column<br>(50 μm×45 cm)             | Three neutral molecules<br>seven egg white proteins            | 20-40                | UV       | Retention time: <3.7%<br>naphthalene: 76290<br>plates·m <sup>-1</sup> | [12] |
| Graphene / graphene oxide modified silica                             | 110000            | Packed column<br>(100 μm×21 cm)        | Three PAHs,<br>three aromatic compounds<br>fresh water         | 6-10                 | UV       | Retention time: <3.8%<br>naphthalene: 76290<br>plates·m <sup>-1</sup> | [13] |
| Stellate mesoporous silica nanospheres                                | 90                | Monolithic column<br>(100 μm×32 cm)    | Alkylbenzenes, anilines,<br>naphthalenes and phenols           | 5-15                 | UV       | N/m: 266000<br>R: <2%                                                 | [17] |
| Highly uniform mesoporous silica                                      | /                 | PLOT column<br>(50 μm×40 cm)           | Basic, neutral samples and<br>tryptic-digestion of<br>proteins | 10-25                | UV       | R: <6.2%                                                              | [18] |
| Organo-silica hybrid                                                  | 245 ± 95          | Monolithic column<br>(100 μm×8.5 cm)   | Alkyl benzenes, cresols<br>and benzoic<br>acid derivatives     | 2-15                 | UV       | N/m: 140000<br>R: <14.2%                                              | [19] |
| CDMPC modified MCM-41 mesoporous silica <sup>b</sup>                  | 600               | OT column<br>(50 μm×50 cm)             | Eight pairs of acidic,<br>neutral and basic<br>enantiomers     | < 1                  | UV       | Benzoin: 20700<br>plates·m <sup>-1</sup>                              | [20] |

|                                                           |           |                                          |                                                                                                                                                  |       |    |                                                                                                    |              |
|-----------------------------------------------------------|-----------|------------------------------------------|--------------------------------------------------------------------------------------------------------------------------------------------------|-------|----|----------------------------------------------------------------------------------------------------|--------------|
| $\beta$ -CD modified non-porous silica                    | 800       | Packed column (100 $\mu\text{m}$ ×10 cm) | Four positional isomers<br>five racemates<br>five benzene series                                                                                 | 12-25 | UV | n-Propylbenzene:<br>170000 plates·m <sup>-1</sup>                                                  | [21]         |
| SM- $\beta$ -CD <sup>c</sup><br>Ordered mesoporous silica | 4000-6000 | Packed (100 $\mu\text{m}$ ×48 cm)        | Stereoisomer of flavanones and flavanone glycosides                                                                                              | 12-25 | UV | N/m: 39580-27010                                                                                   | [23]         |
| Zeolite SiO <sub>2</sub> NPs                              | 50        | OT column (50 $\mu\text{m}$ ×30 cm)      | Paraben homologues<br>four groups of isomers<br>one group of epimers<br>two groups of enantiomers<br>(0.25-40 $\mu\text{g}\cdot\text{mL}^{-1}$ ) | 6-26  | AD | Migration time: <6.1%<br>peak area: <8.4%<br>R: <6.3 %<br>4-Cl-2-MA: 108200 plates·m <sup>-1</sup> | In this work |

<sup>a</sup> PDMAEMA: polymer (Poly(2-(dimethylamino) ethyl methacrylate).

<sup>b</sup> CDMPC: cellulose tris(3,5-dimethylphenyl-carbamate), MCM: mobile crystalline material.

<sup>c</sup> SM- $\beta$ -CD: 3,5-dimethylphenylcarbamoylated  $\beta$ -CD modified spherical ordered mesoporous silica.
